# Supplementary material for: Fast-SG: an alignment-free algorithm for hybrid assembly
Source: PubMed Central journal article supplement (PMC6007556; doi:10.1093/gigascience/giy048), 2018-05-05
Supplement: giy048_reviewer-1-report-(revision-1).pdf [file giy048_reviewer-1-report-%28revision-1%29.pdf]

## **Reviewer Report**

**Title:** Fast-SG: An alignment-free algorithm for hybrid assembly

**Version:** Revision 1      **Date:** 15 Mar 2018

**Reviewer name:** Sagar Utturkar

### **Reviewer Comments to Author:**

Thank you for addressing my comments to satisfaction. Addition of "Procedure for effective hybrid assembly with FAST-SG" section would be very useful for the users.

Suggestion:

I think that Pie-chart representation of scaffolding errors (in previous version) appears neat as compared to current bar-chart. I only requested a minor change to convert the percentage values in pie chart to real numbers. Sometimes, percentage values in pie charts could be a misleading comparison because same percentage value in two pie chart could represent very different real numbers.

Authors can decide which figure to include in the manuscript and I have no reservation with that decision.

### **Level of Interest**

Please indicate how interesting you found the manuscript: An article whose findings are important to those with closely related research interests

### **Quality of Written English**

Please indicate the quality of language in the manuscript: Acceptable

### **Declaration of Competing Interests**

Please complete a declaration of competing interests, considering the following questions:

- Have you in the past five years received reimbursements, fees, funding, or salary from an organisation that may in any way gain or lose financially from the publication of this manuscript, either now or in the future?
- Do you hold any stocks or shares in an organisation that may in any way gain or lose financially from the publication of this manuscript, either now or in the future?
- Do you hold or are you currently applying for any patents relating to the content of the manuscript?

- Have you received reimbursements, fees, funding, or salary from an organization that holds or has applied for patents relating to the content of the manuscript?
- Do you have any other financial competing interests?
- Do you have any non-financial competing interests in relation to this paper?

If you can answer no to all of the above, write 'I declare that I have no competing interests' below. If your reply is yes to any, please give details below.

I declare that I have no competing interests

I agree to the open peer review policy of the journal. I understand that my name will be included on my report to the authors and, if the manuscript is accepted for publication, my named report including any attachments I upload will be posted on the website along with the authors' responses. I agree for my report to be made available under an Open Access Creative Commons CC-BY license (<http://creativecommons.org/licenses/by/4.0/>). I understand that any comments which I do not wish to be included in my named report can be included as confidential comments to the editors, which will not be published.

I agree to the open peer review policy of the journal

To further support our reviewers, we have joined with Publons, where you can gain additional credit to further highlight your hard work (see: <https://publons.com/journal/530/gigascience>). On publication of this paper, your review will be automatically added to Publons, you can then choose whether or not to claim your Publons credit. I understand this statement.

Yes
